# Supplementary material for: A carbamazepine-indomethacin (1 : 1) cocrystal produced by milling
Source: Royal Society of Chemistry journal article supplement (doi:10.1039/c1ce05650f), 2011-01-01

## Electronic Supplementary Information

Profile plot of three phase Rietveld fit to the CBZ:IND diffraction data - full range

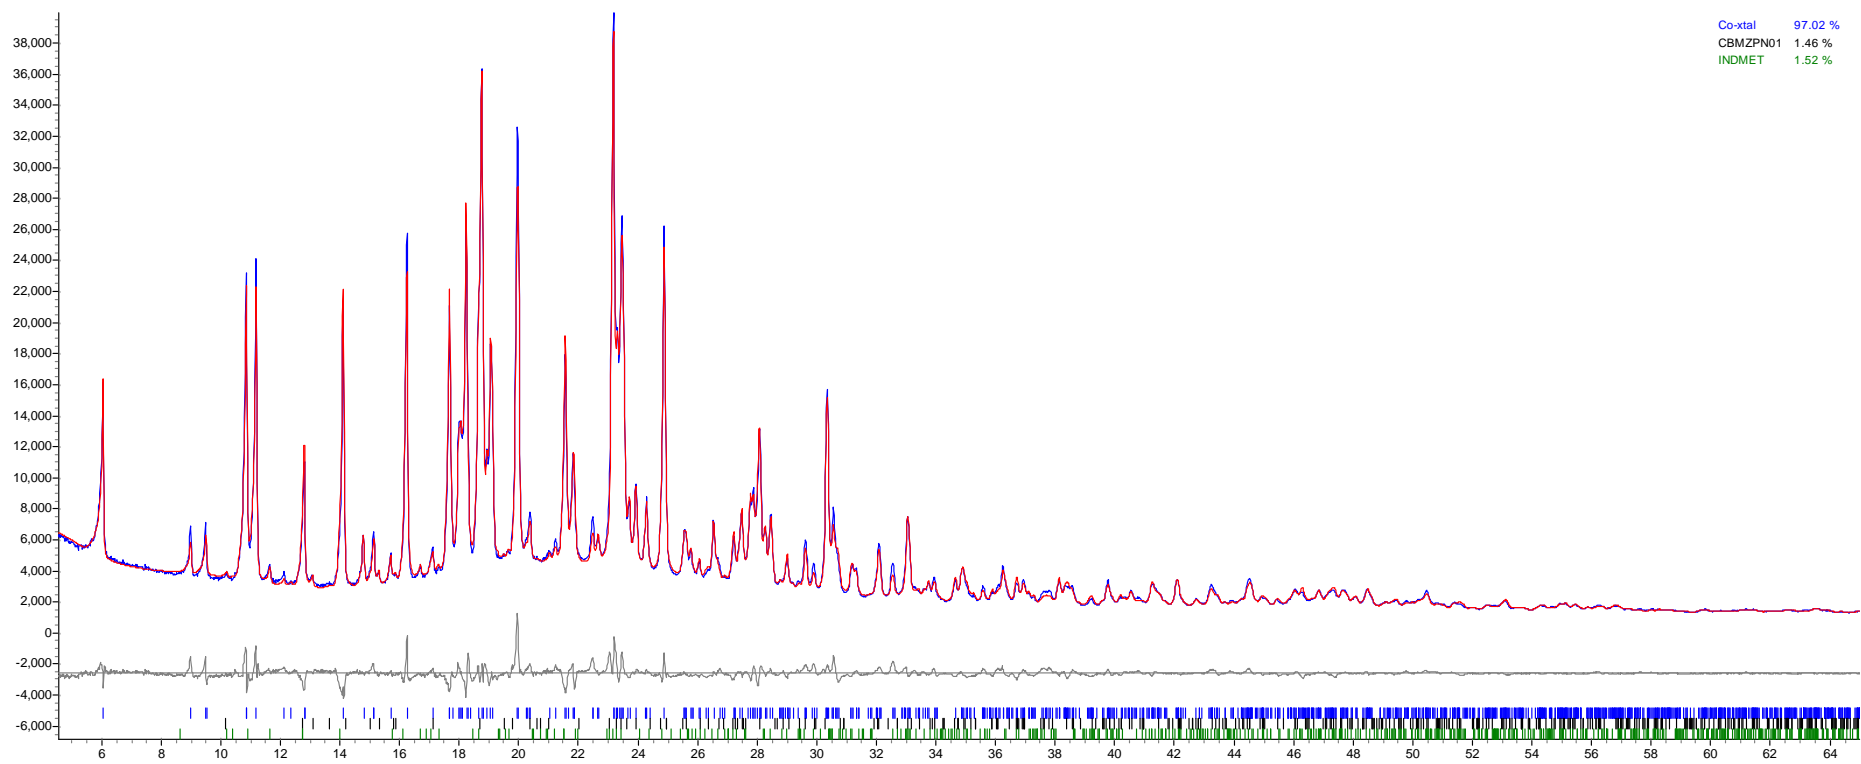

Profile plot of three phase Rietveld fit to the CBZ:IND diffraction data - low angle range

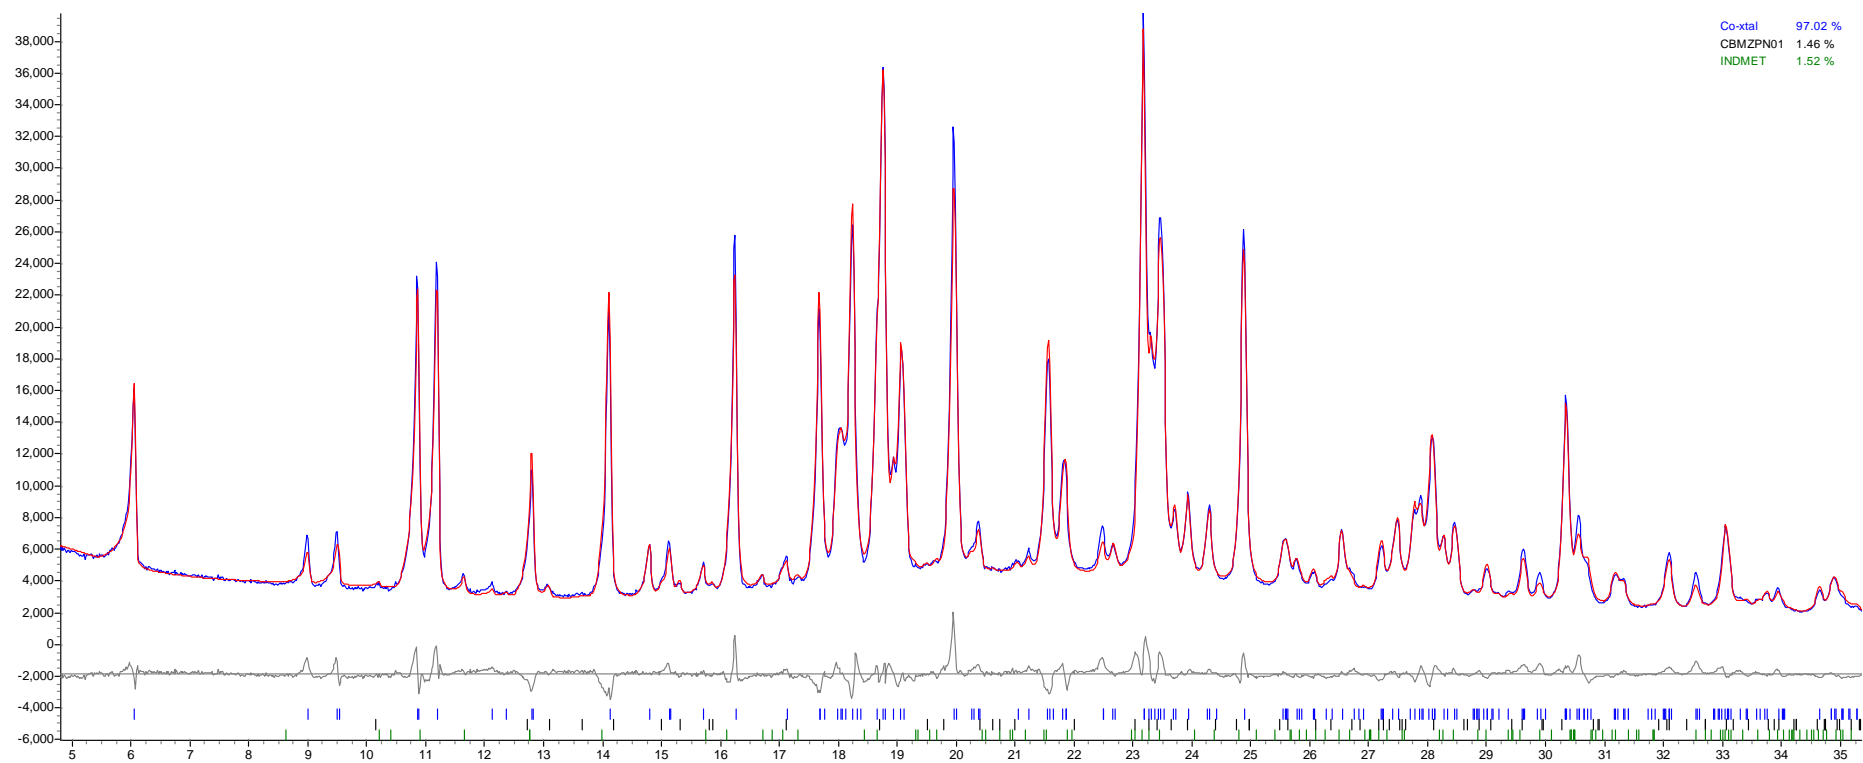

Profile plot of three phase Rietveld fit to the CBZ:IND diffraction data - high angle range

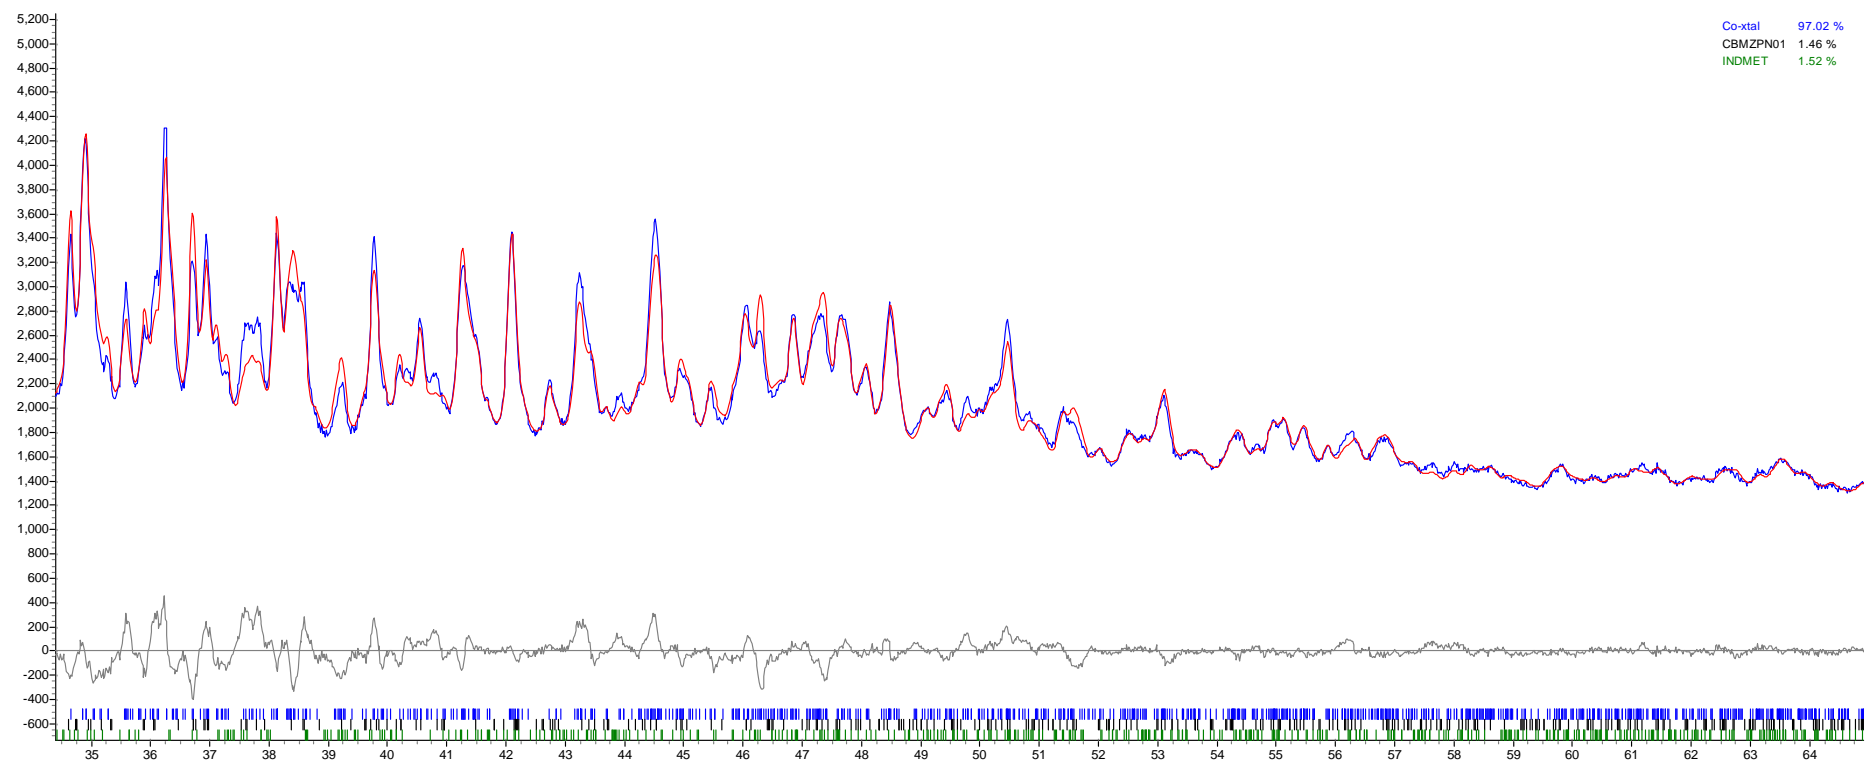

## Solid state calculations

The DASH crystal structure of  $C_{15}H_{12}N_2O:C_{19}H_{16}ClNO_4$  was optimized in the program MOPAC2009,<sup>1</sup> running on a PC equipped with 2.4GHz Intel Core2 Quad CPU and 4Gb memory, using PM6 parameterization.<sup>2,3</sup>

The input cluster of molecules (a packed unit cell of the experimental crystal structure, with H-atoms normalized, 284 atoms total) was created in Mercury<sup>4</sup> and the first atom in the resultant Cartesian coordinate listing was placed at the origin (all other atom positions adjusted accordingly). Translation vectors were applied<sup>5</sup> and the crystal structure geometry optimized using the eigenvector following routine, without the use of symmetry, allowing (x,y,z) of all 284 atoms, plus the lattice parameters, to optimize. The calculation was set to terminate when the gradient norm reached a value  $< 5 \text{ kcal mol}^{-1} \text{ \AA}^{-1}$  (the default) and ran to completion in 210 minutes [enthalpy of formation in the solid state,  $\Delta H_f(\text{solid}) = -129.4 \text{ kcal mol}^{-1}$ ]. The output file was visualized using Mercury and showed a good correspondence with the experimental crystal structure, as evidenced by:

- (i) small lattice parameter differences (Exp. – PM6):  $\Delta a = 0.215$ ,  $\Delta b = -0.070$ ,  $\Delta c = 0.318 \text{ \AA}$ ;  $\Delta\alpha = 0.03$ ,  $\Delta\beta = 0.81$ ,  $\Delta\gamma = -0.34^\circ$ ;  $\Delta V = +132.58 \text{ \AA}^3 \approx -4.5\%$ ;
- (ii) RMSD = 0.255  $\text{\AA}$  for a 15 molecule overlay of the experimental and PM6 crystal structures.

## References

- [1] J. J. P. Stewart, MOPAC2009, Stewart Computational Chemistry, Colorado Springs, CO, USA, <http://OpenMOPAC.net>.
- [2] J. J. P. Stewart, Optimization of parameters for semiempirical methods V: modification of NDDO approximations and application to 70 elements, *J. Mol. Model.* **13**, 1173-1213, 2007.
- [3] J. J. P. Stewart, Application of the PM6 method to modeling the solid state, *J. Mol. Model.* **14**, 499-535, 2008.
- [4] C. F. Macrae, I. J. Bruno, J. A. Chisholm, P. R. Edgington, P. McCabe, E. Pidcock, L. Rodriguez-Monge, R. Taylor, J. van de Streek and P. A. Wood, Mercury CSD 2.0 – new features for the visualization and investigation of crystal structures, *J. Appl. Cryst.*, **41**, 466-470, 2008.
- [5] C. Giacovazzo et al., Transformation from triclinic to orthonormal axes in Fundamentals of Crystallography 2<sup>nd</sup> ed., Oxford University Press, p74 – 76, 2002.

**Differential scanning calorimetry (DSC)** Thermal analyses were performed using a Jade DSC (Perkin Elmer, USA), calibrated for T and H using indium. Samples were weighed (3-5mg), crimped in non-hermetic aluminium pan and scanned at 10 °C/min from 25 °C to 300°C under continuously purged dry nitrogen (flow = 20ml/min). The instrument was equipped with a refrigerated cooling system. Data were collected and analysed using Pyris software.

**Thermogravimetric analysis (TGA)** The change in % of weight upon heating of the samples was performed using STA 6000 thermogravimetric analyser (Perkin Elmer, USA). Samples (~ 12mg) were placed onto a TGA crucible pan and scanned at 10°C/min from 25°C to 300°C under continuously purged dry nitrogen (flow rate of 20ml/min). Data were collected and analysed using Pyris software.

**Results** Thermal analysis data showed an onset of melting at ~ 144°C and enthalpy ( $\Delta H$ ) of ~ 95 J/g for CBZ:IND (1:1) co-crystals using DSC; no noticeable weight loss was observed before melting to support any hydrate mass equivalent loss upon heating using TGA.

DSC and TGA of CBZ, IND and CBZ-IND (1:1) co-crystal

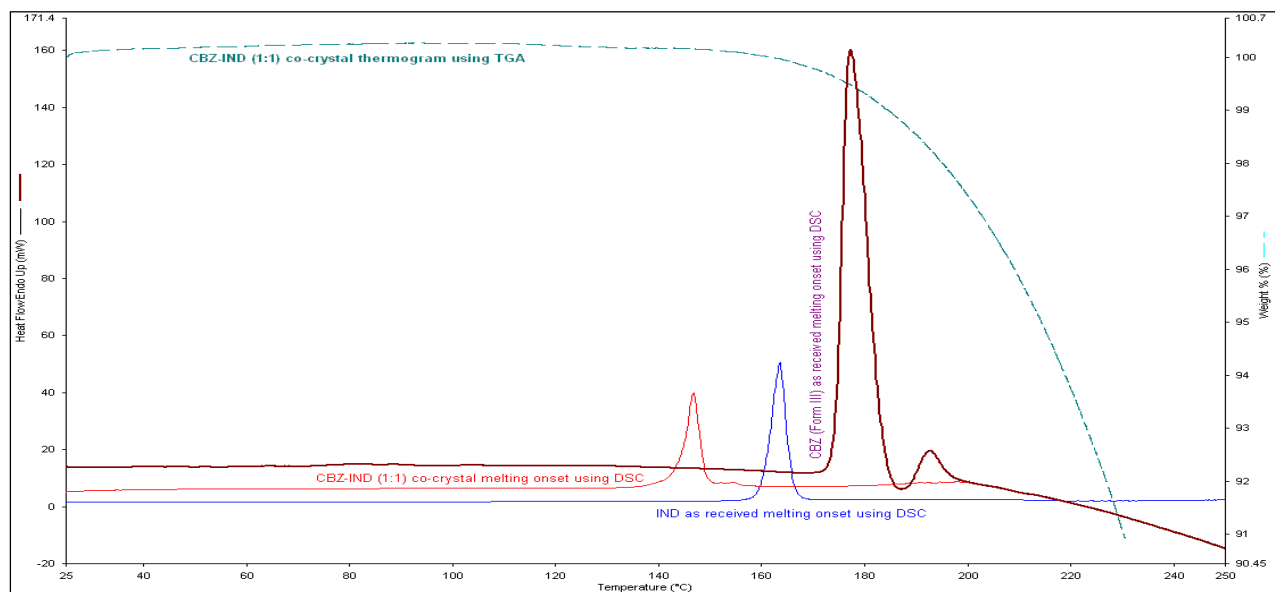

Supplement: c1ce05650f.pdf [file c1ce05650f.pdf]
